# Supplementary material
Source: Springer Nature journal article supplement (https://www.springermedizin.de/resource/supplementary/12950_2011_248_MOESM6_ESM.pdf/9558280)

**A**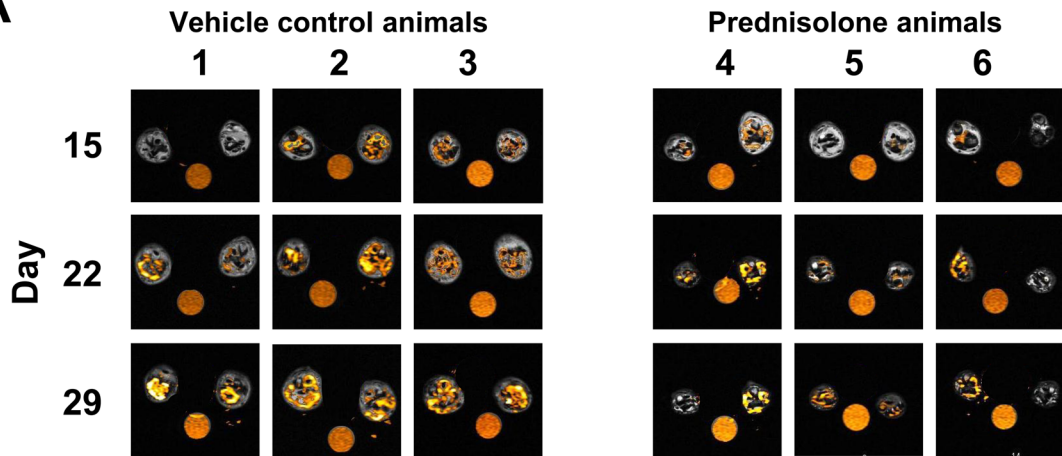**B**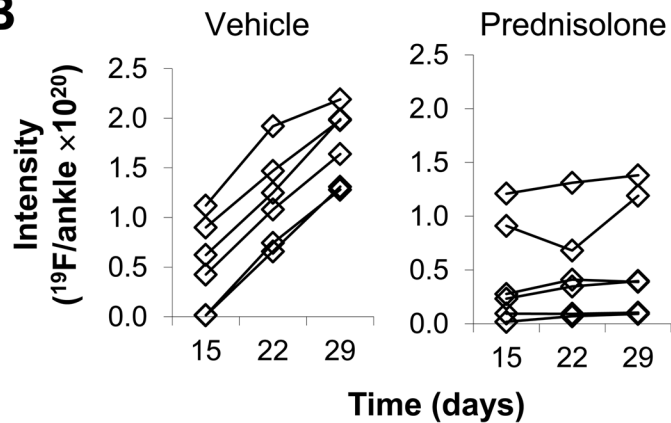**C**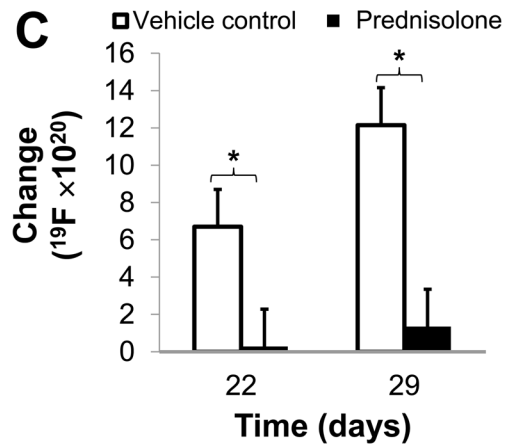

Supplement: MOESM6 [file 9558280]
